# Supplementary material
Source: publisher figshare collection journal article supplement (https://tandf.figshare.com/ndownloader/files/17908046)
Supplement: Supplementary file 1 [file 17908046]

## Supplementary Material

### Numerical simulation of an extreme haze pollution event over the North China Plain based on initial and boundary condition ensembles

Xiaobin LI<sup>a,b</sup>, Hongbo LIU<sup>a</sup>, Ziyin ZHANG<sup>c</sup> and Juanjuan LIU<sup>a,b</sup>

<sup>a</sup>State Key Laboratory of Numerical Modeling for Atmospheric Sciences and Geophysical Fluid Dynamics, Institute of Atmospheric Physics, Chinese Academy of Sciences, Beijing, China; <sup>b</sup>College of Earth and Planetary Sciences, University of Chinese Academy of Sciences, Beijing, China; <sup>c</sup>Institute of Urban Meteorology, China Meteorological Administration, Beijing, China

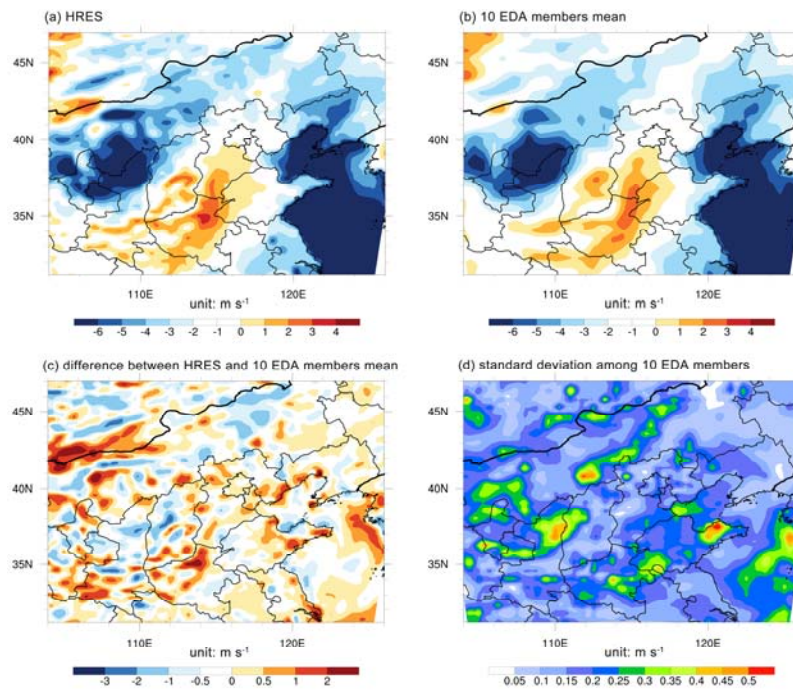

**Figure S1.** 10-meter meridional wind (V10) from (a) HRES, (b) 10 EDA members mean at

0000 UTC 25 November 2015. (c) The difference field between HRES and 10 EDA members mean, and (d) standard deviation among 10 EDA members at the same moment.
